# Supplementary material for: Achieving dynamic behaviour and thermal expansion in the organic solid state via co-crystallization
Source: Royal Society of Chemistry journal article supplement (doi:10.1039/c5sc00988j), 2015-01-01
Supplement: c5sc00988j1.pdf [file c5sc00988j1.pdf]

# Achieving dynamic behavior and thermal expansion in the organic solid state *via* co-crystallization

Kristin M. Hutchins<sup>a</sup>, Ryan H. Groeneman<sup>b</sup>, Eric Reinheimer<sup>c</sup>, Dale C. Swenson<sup>a</sup>, and Leonard R. MacGillivray<sup>a,\*</sup>

<sup>a</sup>Department of Chemistry, University of Iowa, Iowa City, IA 52242-1294, USA, <sup>b</sup>Department of Biological Sciences, Webster University, St. Louis, MO 63119, USA, <sup>c</sup>Department of Chemistry and Biochemistry, W.M. Keck Foundation Center for Molecular Structure, California State University San Marcos, San Marcos, CA 92096, USA

\*Author email address: len-macgillivray@uiowa.edu

## Supplementary Information:

- 1) Experimental information
- 2) Single crystal X-ray diffraction measurements
- 3) Unit cell parameters for co-crystal **1** and **2** at 10 K intervals
- 4) Single-crystal X-ray structures
- 5) Differential Scanning Calorimetry
- 6) Thermal expansion coefficients

## 1) Experimental Information

**4PAzP** was synthesized as reported.<sup>1</sup>

**Preparation of crystals:** Single crystals of **4PAzP** were grown from EtOH. Co-crystals were obtained by dissolving **4PAzP** (50 mg, 0.27 mmol) and the appropriate resorcinol (0.14 mmol) in EtOH. Slow evaporation over 1-2 days yielded single crystals suitable for X-ray diffraction.

## 2) Single crystal X-ray diffraction measurements

Single crystal XRD for the co-crystals was measured on a Nonius Kappa CCD single-crystal X-ray diffractometer using MoK $\alpha$  radiation ( $\lambda=0.71073$  Å). Structure solution and refinement were accomplished using SHELXS and SHELXL, respectively.<sup>2</sup> All non-hydrogen atoms were refined anisotropically. Hydrogen atoms associated with carbon atoms were refined in geometrically constrained positions. Single crystal XRD data for the **4PAzP** data sets were measured on a Rigaku SCXMini diffractometer using MoK $\alpha$  radiation ( $\lambda=0.71073$  Å). The structures were solved and refined using the same programs above within the Olex2<sup>3</sup> graphical user interface. All hydrogen and non-hydrogen atoms in **4PAzP** were treated in a manner analogous to those from the co-crystals.

**Table S1.** Crystallographic parameters for **4PAzP·4,6-diCl res** at variable temperatures.

| compound name                            | <b>4PAzP·4,6-diCl res</b>                                                     | <b>4PAzP·4,6-diCl res</b>                                                     | <b>4PAzP·4,6-diCl res</b>                                                     | <b>4PAzP·4,6-diCl res</b>                                                     |
|------------------------------------------|-------------------------------------------------------------------------------|-------------------------------------------------------------------------------|-------------------------------------------------------------------------------|-------------------------------------------------------------------------------|
| chemical formula                         | C <sub>28</sub> H <sub>22</sub> N <sub>6</sub> O <sub>2</sub> Cl <sub>2</sub> | C <sub>28</sub> H <sub>22</sub> N <sub>6</sub> O <sub>2</sub> Cl <sub>2</sub> | C <sub>28</sub> H <sub>22</sub> N <sub>6</sub> O <sub>2</sub> Cl <sub>2</sub> | C <sub>28</sub> H <sub>22</sub> N <sub>6</sub> O <sub>2</sub> Cl <sub>2</sub> |
| formula mass                             | 545.41                                                                        | 545.41                                                                        | 545.41                                                                        | 545.41                                                                        |
| crystal system                           | Monoclinic                                                                    | Monoclinic                                                                    | Monoclinic                                                                    | Monoclinic                                                                    |
| space group                              | <i>P2<sub>1</sub>/c</i>                                                       | <i>P2<sub>1</sub>/c</i>                                                       | <i>P2<sub>1</sub>/c</i>                                                       | <i>P2<sub>1</sub>/c</i>                                                       |
| T/K                                      | 290(2)                                                                        | 270(2)                                                                        | 250(2)                                                                        | 170(2)                                                                        |
| a/Å                                      | 14.400(6)                                                                     | 14.4187(14)                                                                   | 15.6347(16)                                                                   | 15.6181(16)                                                                   |
| b/Å                                      | 19.510(8)                                                                     | 19.4064(19)                                                                   | 15.9890(16)                                                                   | 15.7722(16)                                                                   |
| c/Å                                      | 9.757(4)                                                                      | 9.7692(9)                                                                     | 10.6460(11)                                                                   | 10.6301(11)                                                                   |
| $\alpha$ /°                              | 90.00                                                                         | 90.00                                                                         | 90.00                                                                         | 90.00                                                                         |
| $\beta$ /°                               | 95.784(15)                                                                    | 95.552(5)                                                                     | 95.252(5)                                                                     | 95.137(5)                                                                     |
| $\gamma$ /°                              | 90.00                                                                         | 90.00                                                                         | 90.00                                                                         | 90.00                                                                         |
| V/Å <sup>3</sup>                         | 2727.2(19)                                                                    | 2720.7(5)                                                                     | 2650.1(5)                                                                     | 2608.0(5)                                                                     |
| $\rho_{\text{calc}}$ /g cm <sup>-3</sup> | 1.343                                                                         | 1.346                                                                         | 1.367                                                                         | 1.389                                                                         |
| Z                                        | 4                                                                             | 4                                                                             | 4                                                                             | 4                                                                             |
| radiation type                           | Mo K $\alpha_1$                                                               | Mo K $\alpha_1$                                                               | Mo K $\alpha_1$                                                               | Mo K $\alpha_1$                                                               |
| $\mu$ /mm <sup>-1</sup>                  | 0.275                                                                         | 0.276                                                                         | 0.283                                                                         | 0.287                                                                         |
| no. of reflections measured              | 30069                                                                         | 29819                                                                         | 14606                                                                         | 22474                                                                         |
| no. of independent reflections           | 4999                                                                          | 4944                                                                          | 4720                                                                          | 6180                                                                          |
| no of reflection (I > 2 $\sigma$ (I))    | 2899                                                                          | 3071                                                                          | 3079                                                                          | 4701                                                                          |
| R <sub>int</sub>                         | 0.0283                                                                        | 0.0261                                                                        | 0.0416                                                                        | 0.0395                                                                        |
| R <sub>1</sub> (I > 2 $\sigma$ (I))      | 0.0438                                                                        | 0.0428                                                                        | 0.0508                                                                        | 0.0422                                                                        |
| wR(F <sup>2</sup> ) (I > 2 $\sigma$ (I)) | 0.0966                                                                        | 0.0960                                                                        | 0.1023                                                                        | 0.0955                                                                        |
| R <sub>1</sub> (all data)                | 0.0869                                                                        | 0.0811                                                                        | 0.1018                                                                        | 0.0651                                                                        |
| wR(F <sup>2</sup> ) (all data)           | 0.1202                                                                        | 0.1196                                                                        | 0.1185                                                                        | 0.1070                                                                        |
| CCDC deposition number                   | 1026675                                                                       | 1026674                                                                       | 1026673                                                                       | 1026672                                                                       |

**Table S2.** Crystallographic parameters for **4PAzP·4,6-diBromo res** at variable temperatures.

| compound name                         | <b>4PAzP·4,6-diBr res</b>                                                     | <b>4PAzP·4,6-diBr res</b>                                                     | <b>4PAzP·4,6-diBr res</b>                                                     |
|---------------------------------------|-------------------------------------------------------------------------------|-------------------------------------------------------------------------------|-------------------------------------------------------------------------------|
| chemical formula                      | C <sub>28</sub> H <sub>22</sub> N <sub>6</sub> O <sub>2</sub> Br <sub>2</sub> | C <sub>28</sub> H <sub>22</sub> N <sub>6</sub> O <sub>2</sub> Br <sub>2</sub> | C <sub>28</sub> H <sub>22</sub> N <sub>6</sub> O <sub>2</sub> Br <sub>2</sub> |
| formula mass                          | 634.33                                                                        | 634.33                                                                        | 634.33                                                                        |
| crystal system                        | Monoclinic                                                                    | Monoclinic                                                                    | Monoclinic                                                                    |
| space group                           | <i>P2<sub>1</sub>/c</i>                                                       | <i>P2<sub>1</sub>/c</i>                                                       | <i>P2<sub>1</sub>/c</i>                                                       |
| T/K                                   | 290(2)                                                                        | 270(2)                                                                        | 190(2)                                                                        |
| a/Å                                   | 14.5095(15)                                                                   | 14.5204(15)                                                                   | 13.5422(13)                                                                   |
| b/Å                                   | 20.268(2)                                                                     | 20.207(2)                                                                     | 19.6750(19)                                                                   |
| c/Å                                   | 9.5541(10)                                                                    | 9.4966(9)                                                                     | 10.2805(10)                                                                   |
| α/°                                   | 90.00                                                                         | 90.00                                                                         | 90.00                                                                         |
| β/°                                   | 97.192(5)                                                                     | 97.176(5)                                                                     | 100.796(3)                                                                    |
| γ/°                                   | 90.00                                                                         | 90.00                                                                         | 90.00                                                                         |
| V/Å <sup>3</sup>                      | 2787.5(5)                                                                     | 2764.6(5)                                                                     | 2690.7(5)                                                                     |
| ρ <sub>calc</sub> /g cm <sup>-3</sup> | 1.511                                                                         | 1.524                                                                         | 1.5658                                                                        |
| Z                                     | 4                                                                             | 4                                                                             | 4                                                                             |
| radiation type                        | Mo K <sub>α1</sub>                                                            | Mo K <sub>α1</sub>                                                            | Mo K <sub>α1</sub>                                                            |
| μ /mm <sup>-1</sup>                   | 2.944                                                                         | 2.968                                                                         | 3.05                                                                          |
| no. of reflections measured           | 14038                                                                         | 62803                                                                         | 33843                                                                         |
| no. of independent reflections        | 4907                                                                          | 4217                                                                          | 4734                                                                          |
| no of reflection (I > 2σ(I))          | 2711                                                                          | 2616                                                                          | 3920                                                                          |
| R <sub>int</sub>                      | 0.0329                                                                        | 0.0489                                                                        | 0.0263                                                                        |
| R <sub>1</sub> (I > 2σ(I))            | 0.0411                                                                        | 0.0551                                                                        | 0.0295                                                                        |
| wR(F <sup>2</sup> ) (I > 2σ(I))       | 0.1169                                                                        | 0.0711                                                                        | 0.0893                                                                        |
| R <sub>1</sub> (all data)             | 0.0982                                                                        | 0.1220                                                                        | 0.0430                                                                        |
| wR(F <sup>2</sup> ) (all data)        | 0.1564                                                                        | 0.0920                                                                        | 0.1185                                                                        |
| CCDC deposition number                | 1026671                                                                       | 1400641                                                                       | 1026670                                                                       |

**Table S3.** Crystallographic parameters for **4PAzP·4,6-diIodo res** and **4PAzP** at variable temperatures.

| compound name                            | <b>4PAzP·4,6-diIodo res</b>                                                  | <b>4PAzP·4,6-diIodo res</b>                                                  | <b>4PAzP</b>                                          | <b>4PAzP</b>                                          |
|------------------------------------------|------------------------------------------------------------------------------|------------------------------------------------------------------------------|-------------------------------------------------------|-------------------------------------------------------|
| chemical formula                         | C <sub>28</sub> H <sub>22</sub> N <sub>6</sub> O <sub>2</sub> I <sub>2</sub> | C <sub>28</sub> H <sub>22</sub> N <sub>6</sub> O <sub>2</sub> I <sub>2</sub> | C <sub>11</sub> H <sub>9</sub> N <sub>3</sub>         | C <sub>11</sub> H <sub>9</sub> N <sub>3</sub>         |
| formula mass                             | 728.31                                                                       | 728.31                                                                       | 183.21                                                | 183.21                                                |
| crystal system                           | Triclinic                                                                    | Triclinic                                                                    | Orthorhombic                                          | Orthorhombic                                          |
| space group                              | <i>P</i> -1                                                                  | <i>P</i> -1                                                                  | <i>P</i> 2 <sub>1</sub> 2 <sub>1</sub> 2 <sub>1</sub> | <i>P</i> 2 <sub>1</sub> 2 <sub>1</sub> 2 <sub>1</sub> |
| T/K                                      | 290(2)                                                                       | 190(2)                                                                       | 290(2)                                                | 170(2)                                                |
| a/Å                                      | 9.0480(9)                                                                    | 8.9820(9)                                                                    | 5.911(9)                                              | 5.9077(7)                                             |
| b/Å                                      | 12.5933(13)                                                                  | 12.5271(13)                                                                  | 7.496(11)                                             | 7.4479(9)                                             |
| c/Å                                      | 26.305(3)                                                                    | 26.146(3)                                                                    | 21.820(3)                                             | 21.752(3)                                             |
| $\alpha$ /°                              | 83.815(5)                                                                    | 84.500(5)                                                                    | 90.00                                                 | 90.00                                                 |
| $\beta$ /°                               | 89.271(5)                                                                    | 89.331(5)                                                                    | 90.00                                                 | 90.00                                                 |
| $\gamma$ /°                              | 75.005(5)                                                                    | 74.563(5)                                                                    | 90.00                                                 | 90.00                                                 |
| V/Å <sup>3</sup>                         | 2878.0(5)                                                                    | 2822.4(5)                                                                    | 967.0(2)                                              | 957.1(2)                                              |
| $\rho_{\text{calc}}$ /g cm <sup>-3</sup> | 1.681                                                                        | 1.714                                                                        | 1.259                                                 | 1.271                                                 |
| Z                                        | 4                                                                            | 4                                                                            | 4                                                     | 4                                                     |
| radiation type                           | Mo K $_{\alpha 1}$                                                           | Mo K $_{\alpha 1}$                                                           | Mo K $_{\alpha 1}$                                    | Mo K $_{\alpha 1}$                                    |
| $\mu$ /mm <sup>-1</sup>                  | 2.221                                                                        | 2.264                                                                        | 0.079                                                 | 0.080                                                 |
| no. of reflections measured              | 19210                                                                        | 38202                                                                        | 7882                                                  | 7818                                                  |
| no. of independent reflections           | 10494                                                                        | 12943                                                                        | 2201                                                  | 2193                                                  |
| no of reflection (I > 2 $\sigma$ (I))    | 6588                                                                         | 10557                                                                        | 1214                                                  | 1339                                                  |
| R <sub>int</sub>                         | 0.0249                                                                       | 0.0194                                                                       | 0.0481                                                | 0.0425                                                |
| R <sub>1</sub> (I > 2 $\sigma$ (I))      | 0.0557                                                                       | 0.0352                                                                       | 0.0559                                                | 0.0524                                                |
| wR(F <sup>2</sup> ) (I > 2 $\sigma$ (I)) | 0.1585                                                                       | 0.0976                                                                       | 0.1245                                                | 0.1198                                                |
| R <sub>1</sub> (all data)                | 0.0959                                                                       | 0.0487                                                                       | 0.1087                                                | 0.0959                                                |
| wR(F <sup>2</sup> ) (all data)           | 0.2001                                                                       | 0.1233                                                                       | 0.1489                                                | 0.1411                                                |
| CCDC deposition number                   | 1026677                                                                      | 1026676                                                                      | 1026679                                               | 1026678                                               |

### 3) Unit cell parameters for co-crystal 1 and 2 at 10 K intervals

**Table S4.** Unit cell parameters from 290-170 K for co-crystal **1**. Unit cell determinations were performed on a single crystal at 10 K intervals.

| <b>Cell Dimensions</b>   | <b>290 K</b> | <b>280 K</b> | <b>270 K</b> | <b>260 K</b> | <b>250 K</b> |
|--------------------------|--------------|--------------|--------------|--------------|--------------|
| a (Å)                    | 14.408(1)    | 14.412(1)    | 14.416(1)    | 14.422(1)    | 15.6506(9)   |
| b (Å)                    | 19.508(2)    | 19.451(1)    | 19.389(1)    | 19.325(1)    | 16.0014(9)   |
| c (Å)                    | 9.7623(7)    | 9.7625(7)    | 9.7661(7)    | 9.7741(6)    | 10.6508(6)   |
| alpha (°)                | 90           | 90           | 90           | 90           | 90           |
| beta (°)                 | 95.774(2)    | 95.701(2)    | 95.618(2)    | 95.526(2)    | 95.244(2)    |
| gamma (°)                | 90           | 90           | 90           | 90           | 90           |
| volume (Å <sup>3</sup> ) | 2730.0(6)    | 2723.2(5)    | 2716.7(5)    | 2711.5(5)    | 2656.1(4)    |

  

| <b>Cell Dimensions</b>   | <b>240 K</b> | <b>230 K</b> | <b>220 K</b> | <b>210 K</b> | <b>200 K</b> |
|--------------------------|--------------|--------------|--------------|--------------|--------------|
| a (Å)                    | 15.6467(9)   | 15.6463(8)   | 15.6434(8)   | 15.6396(8)   | 15.6370(8)   |
| b (Å)                    | 15.9723(9)   | 15.9470(8)   | 15.9165(8)   | 15.8875(8)   | 15.8601(8)   |
| c (Å)                    | 10.6478(6)   | 10.6479(5)   | 10.6456(5)   | 10.6437(5)   | 10.6426(6)   |
| alpha (°)                | 90           | 90           | 90           | 90           | 90           |
| beta (°)                 | 95.205(2)    | 95.199(2)    | 95.185(2)    | 95.173(2)    | 95.151(2)    |
| gamma (°)                | 90           | 90           | 90           | 90           | 90           |
| volume (Å <sup>3</sup> ) | 2650.1(4)    | 2645.8(4)    | 2639.8(4)    | 2633.9(4)    | 2628.8(4)    |

  

| <b>Cell Dimensions</b>   | <b>190 K</b> | <b>180 K</b> | <b>170 K</b> |
|--------------------------|--------------|--------------|--------------|
| a (Å)                    | 15.6344(8)   | 15.6320(8)   | 15.6307(8)   |
| b (Å)                    | 15.8331(8)   | 15.8071(8)   | 15.7833(9)   |
| c (Å)                    | 10.6414(5)   | 10.6392(5)   | 10.6384(6)   |
| alpha (°)                | 90           | 90           | 90           |
| beta (°)                 | 95.139(2)    | 95.124(2)    | 95.110(2)    |
| gamma (°)                | 90           | 90           | 90           |
| volume (Å <sup>3</sup> ) | 2623.6(4)    | 2618.4(4)    | 2614.1(4)    |

**Table S5.** Unit cell parameters from 290-170 K for co-crystal **2**. Unit cell determinations were performed on a single crystal at 10 K intervals.

| <b>Cell Dimensions</b>   | <b>290 K</b> | <b>280 K</b> | <b>270 K</b> | <b>260 K</b> | <b>250 K</b> |
|--------------------------|--------------|--------------|--------------|--------------|--------------|
| a (Å)                    | 14.5154      | 14.5244      | 14.5323      | 14.5367      | 13.5515      |
| b (Å)                    | 20.2494      | 20.2399      | 20.2282      | 20.2139      | 19.7917      |
| c (Å)                    | 9.539        | 9.5207       | 9.5023       | 9.4844       | 10.3218      |
| alpha (°)                | 90           | 90           | 90           | 90           | 90           |
| beta (°)                 | 97.178       | 97.175       | 97.173       | 97.1657      | 100.565      |
| gamma (°)                | 90           | 90           | 90           | 90           | 90           |
| volume (Å <sup>3</sup> ) | 2781.8       | 2776.9       | 2771.5       | 2765.2       | 2721.5       |

  

| <b>Cell Dimensions</b>   | <b>240 K</b> | <b>230 K</b> | <b>220 K</b> | <b>210 K</b> | <b>200 K</b> |
|--------------------------|--------------|--------------|--------------|--------------|--------------|
| a (Å)                    | 13.5473      | 13.5457      | 13.5437      | 13.5407      | 13.5339      |
| b (Å)                    | 19.7674      | 19.7476      | 19.7244      | 19.7002      | 19.6675      |
| c (Å)                    | 10.3131      | 10.305       | 10.2965      | 10.2875      | 10.2725      |
| alpha (°)                | 90           | 90           | 90           | 90           | 90           |
| beta (°)                 | 100.6219     | 100.6688     | 100.7279     | 100.7645     | 100.81       |
| gamma (°)                | 90           | 90           | 90           | 90           | 90           |
| volume (Å <sup>3</sup> ) | 2714.5       | 2708.9       | 2702.5       | 2695.9       | 2685.8       |

  

| <b>Cell Dimensions</b>   | <b>190 K</b> | <b>180 K</b> | <b>170 K</b> |
|--------------------------|--------------|--------------|--------------|
| a (Å)                    | 13.5376      | 13.5292      | 13.5288      |
| b (Å)                    | 19.6519      | 19.6188      | 19.5985      |
| c (Å)                    | 10.27        | 10.2585      | 10.254       |
| alpha (°)                | 90           | 90           | 90           |
| beta (°)                 | 100.847      | 100.88       | 100.903      |
| gamma (°)                | 90           | 90           | 90           |
| volume (Å <sup>3</sup> ) | 2683.4       | 2673.9       | 2669.7       |

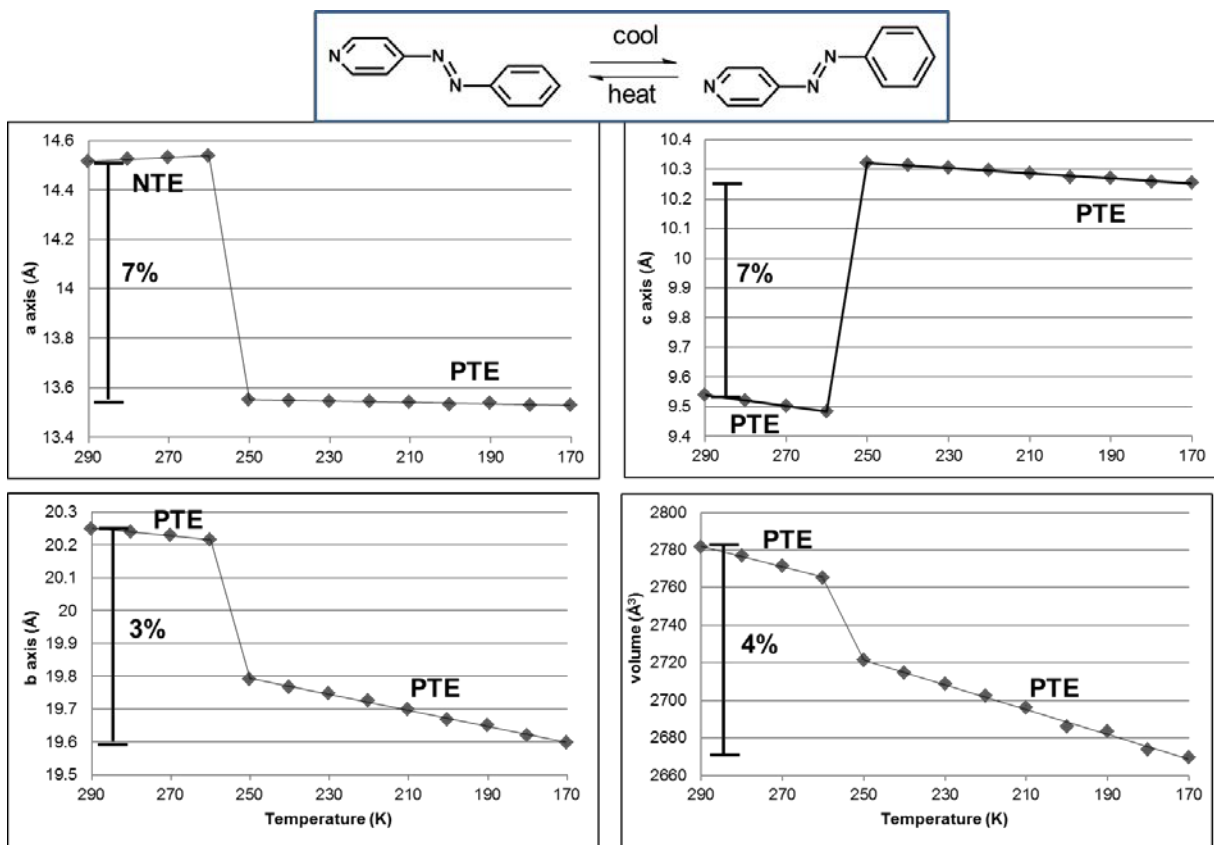

**Fig. S1.** Unit-cell parameters as a function of temperature for **2**. Linear fits of the data are provided.



#### 4) Single-crystal X-ray structures

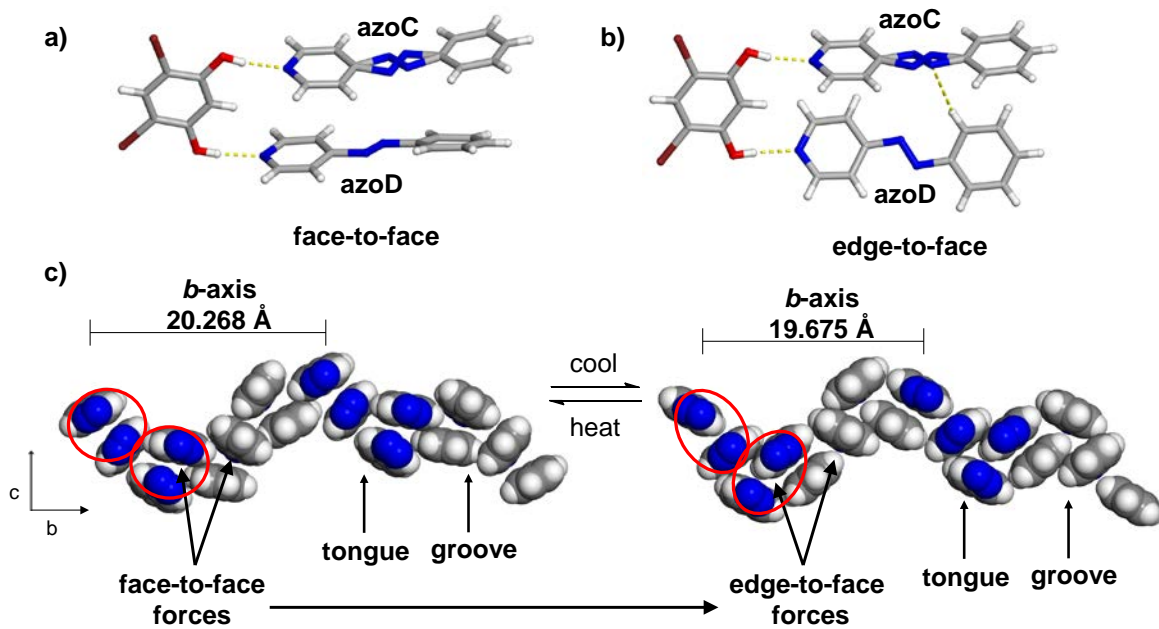

**Fig. S2.** Crystal structures of **2** (290 K to 190 K): (a) three-component assembly at 290 K, (b) three-component assembly at 190 K, and (c) interconversion of face-to-face and edge-to-face  $\pi$ - $\pi$  interactions along the *b*-axis (circling corresponds to azo groups of an assembly).

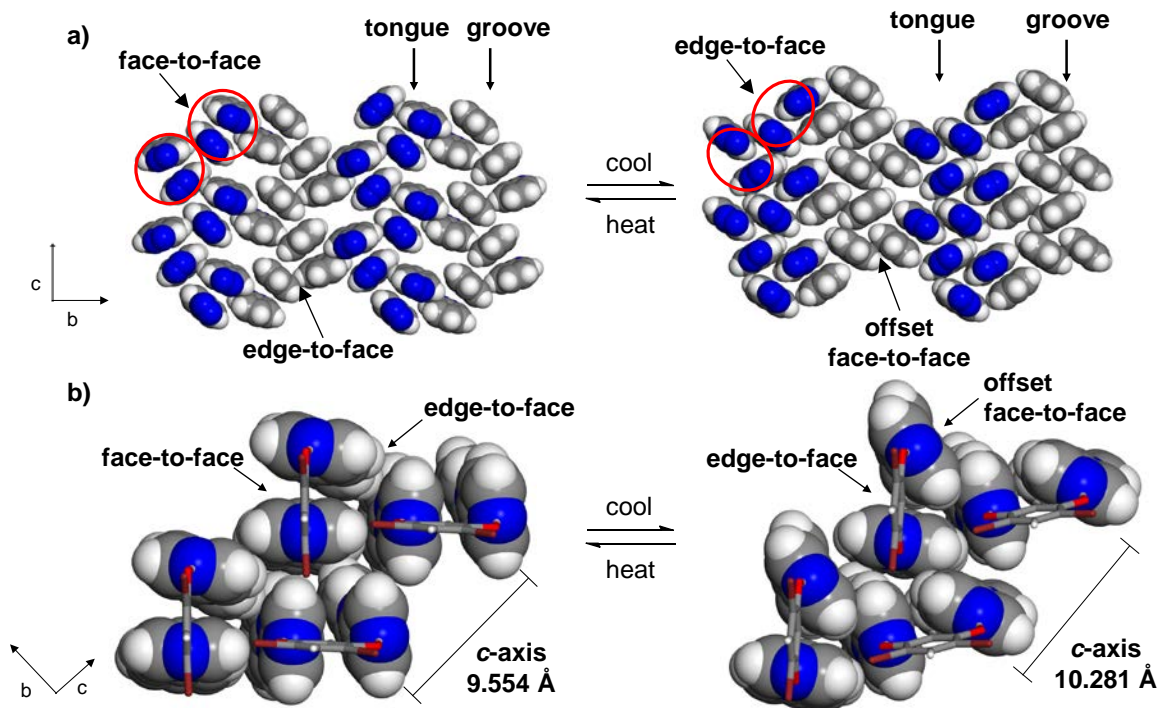

**Fig. S3.** Interconversion of  $\pi$ - $\pi$  stacking in **2** (290 K to 190 K): (a) 2D sheet interactions (circling corresponds to azo groups of an assembly) and (b) interconversions between edge-to-face and face-to-face packings within a groove.

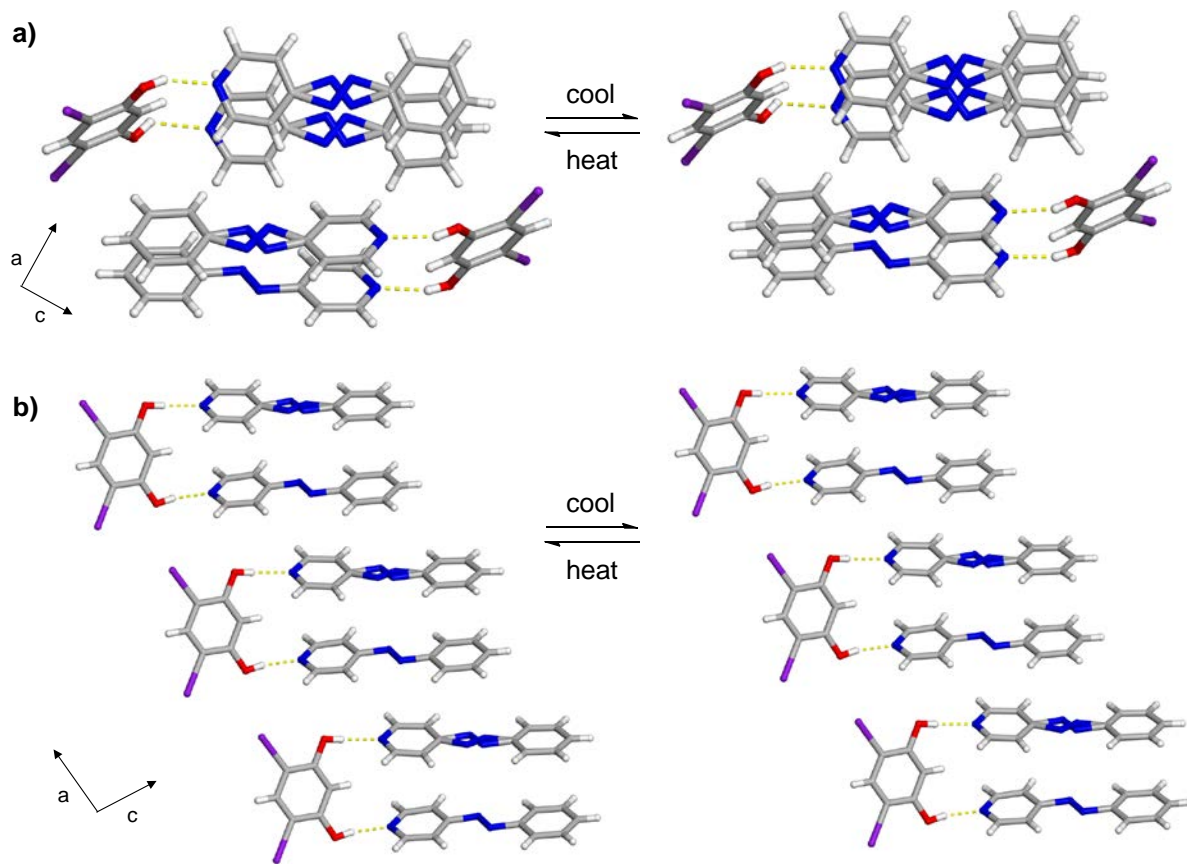

**Fig. S4.** Crystal structures of **3** at 290 and 190 K: (a) asymmetric unit containing three disordered azo groups and (b) extended parallel stacked column of one type of three-component assembly.

## 5) Differential Scanning Calorimetry

Differential scanning calorimetry was performed on powdered samples using a TA DSC Q100. Approximately 5 mg of sample was sealed in a crimped aluminum pan. The experiment was conducted using nitrogen purge. Samples were cooled from RT to 215 K, equilibrated, and warmed to RT. The cycle was repeated a second time unless otherwise noted.

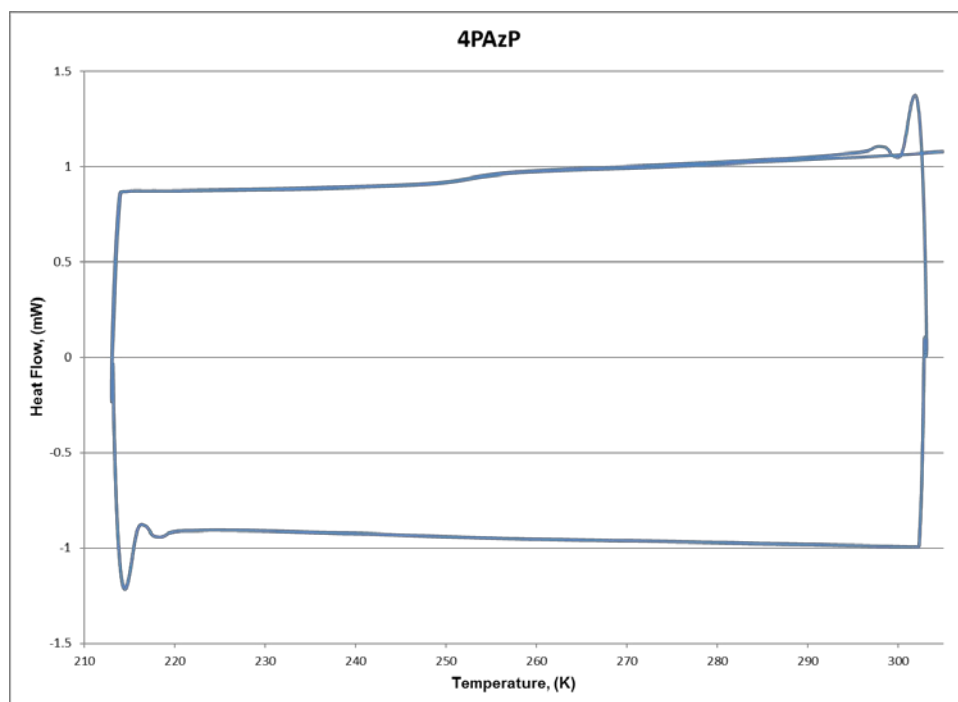

**Fig. S5.** DSC of **4PAzP** showing no phase transition. The small peaks at 30 and -60 °C are artifacts of the cooling cycle process.

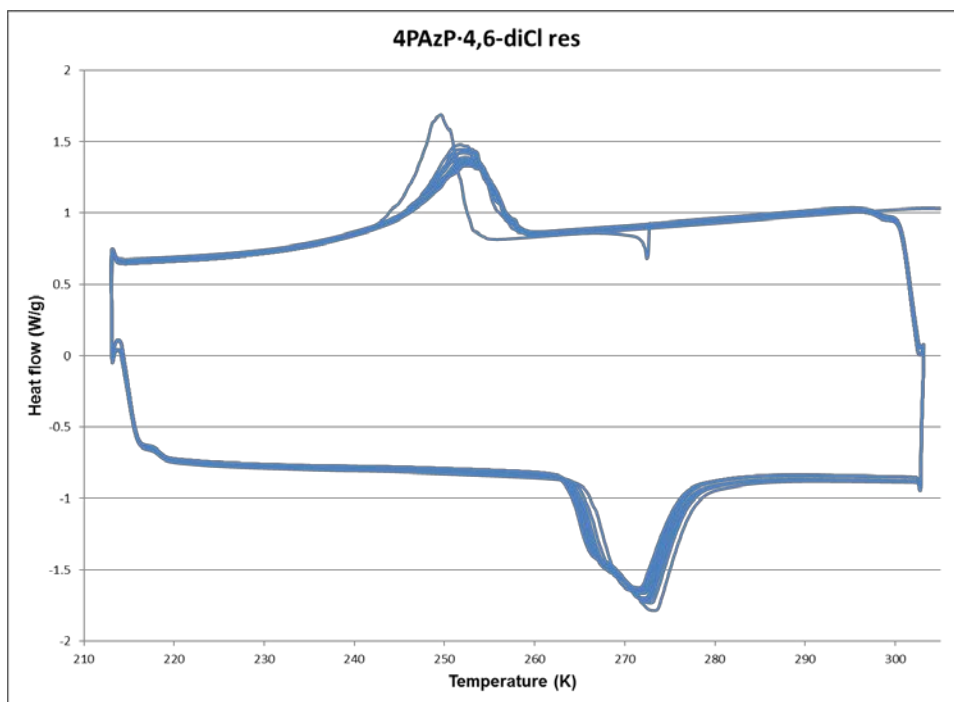

**Fig. S6.** DSC of **1** showing reversible phase transition. The cycle was repeated 15 times. See references 4-6 for hysteresis and peak shifts in a first-order phase transition.

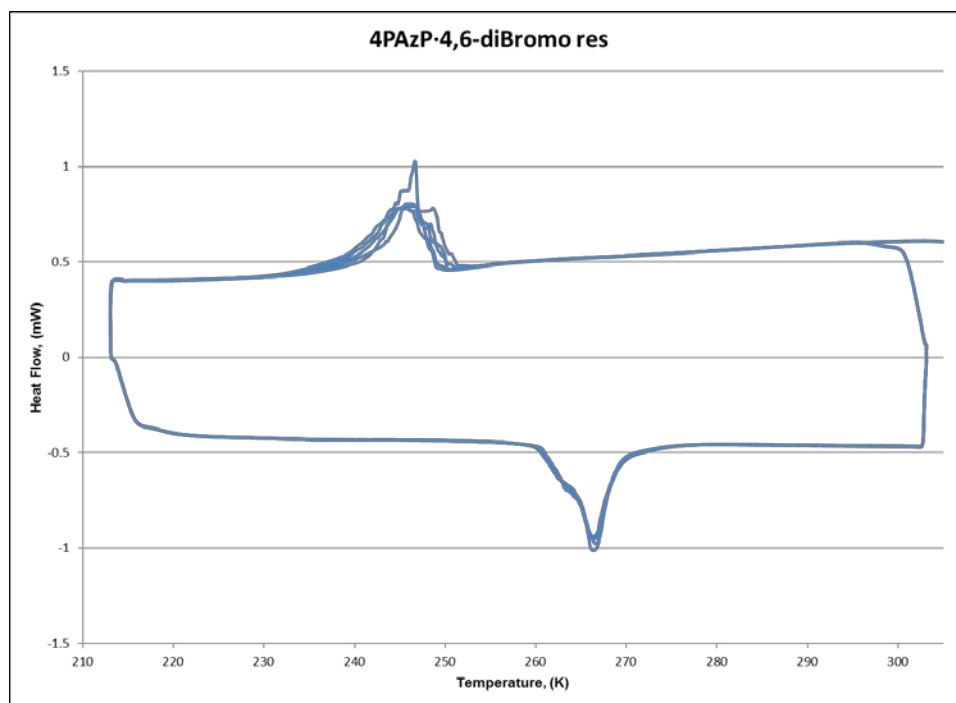

**Fig. S7.** DSC of **2** showing reversible phase transition. The cycle was repeated 5 times. See references 4-6 for hysteresis and peak shifts in a first-order phase transition.

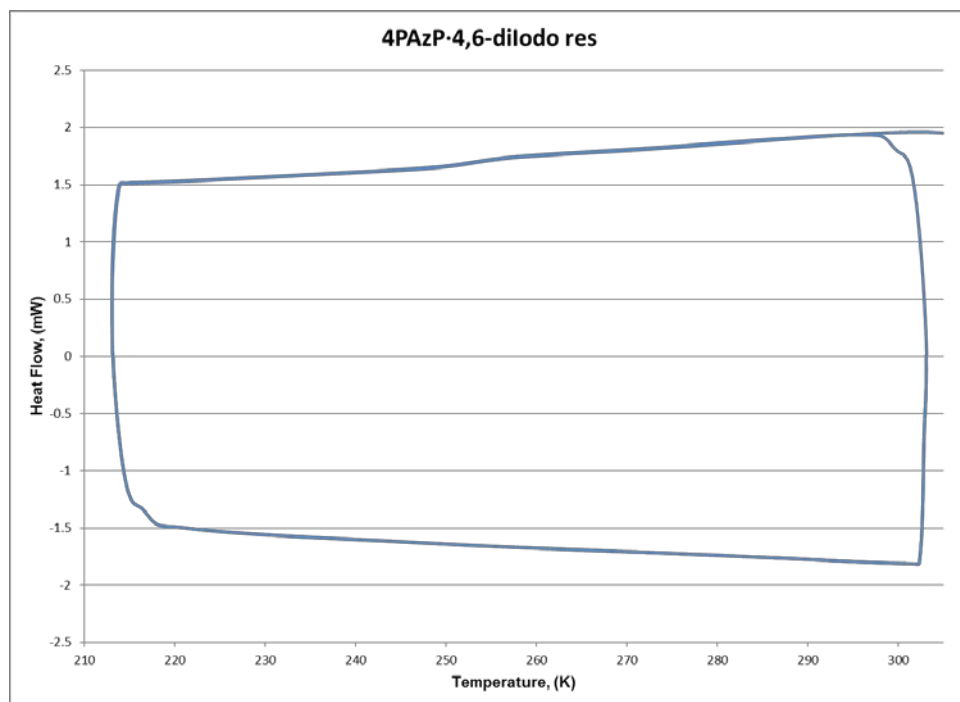

**Fig. S8.** DSC of **3** showing no phase transition.

## 6) Thermal expansion coefficients

The thermal expansion coefficients were calculated using the PASCAL program.<sup>7</sup> The data from the unit cell determinations were used for **1** and **2**, and the crystallographic data sets were used for **3** and **4PAzP** (Tables S2-S4).

**Table S6.** Thermal expansion coefficients for co-crystals **1-3** and **4PAzP**.

| Temperature range (K)       | $\alpha_{x1}$ (MK <sup>-1</sup> ) | $\alpha_{x2}$ (MK <sup>-1</sup> ) | $\alpha_{x3}$ (MK <sup>-1</sup> ) | $\alpha_v$ (MK <sup>-1</sup> ) |
|-----------------------------|-----------------------------------|-----------------------------------|-----------------------------------|--------------------------------|
| <b>4PAzP·4,6-diCl res</b>   |                                   |                                   |                                   |                                |
| 290-260                     | -116                              | 29                                | 316                               | 229                            |
| 250-170                     | 0.5                               | 28                                | 174                               | 203                            |
| <b>4PAzP·4,6-diBr res</b>   |                                   |                                   |                                   |                                |
| 290-260                     | -51                               | 58                                | 193                               | 201                            |
| 250-170                     | 10                                | 111                               | 125                               | 249                            |
| <b>4PAzP·4,6-diIodo res</b> |                                   |                                   |                                   |                                |
| 290-190                     | -13                               | 74                                | 135                               | 197                            |
| <b>4PAzP</b>                |                                   |                                   |                                   |                                |
| 290-170                     | 5                                 | 26                                | 54                                | 85                             |

$\alpha_{x1}$ ,  $\alpha_{x2}$ , and  $\alpha_{x3}$  are the thermal expansion coefficients for the principal crystallographic axes shown in Table S2.

$\alpha_{x1}$  is the volumetric thermal expansion coefficient.

**Table S7.** Approximate crystallographic axes for the calculated principal crystallographic axes.

| Co-crystal                                  | Approximate crystallographic axis for X1 | Approximate crystallographic axis for X2 | Approximate crystallographic axis for X3 |
|---------------------------------------------|------------------------------------------|------------------------------------------|------------------------------------------|
| <b>4PAzP·4,6-diCl res</b><br><b>290-260</b> | 203                                      | 10-1                                     | 010                                      |
| <b>4PAzP·4,6-diCl res</b><br><b>250-170</b> | 203                                      | -203                                     | 010                                      |
| <b>4PAzP·4,6-diBr res</b><br><b>290-260</b> | 100                                      | 010                                      | 001                                      |
| <b>4PAzP·4,6-diBr res</b><br><b>250-170</b> | 201                                      | 103                                      | 010                                      |
| <b>4PAzP·4,6-diIodo res</b>                 | 13-1                                     | 401                                      | 431                                      |
| <b>4PAzP</b>                                | 100                                      | 001                                      | 010                                      |

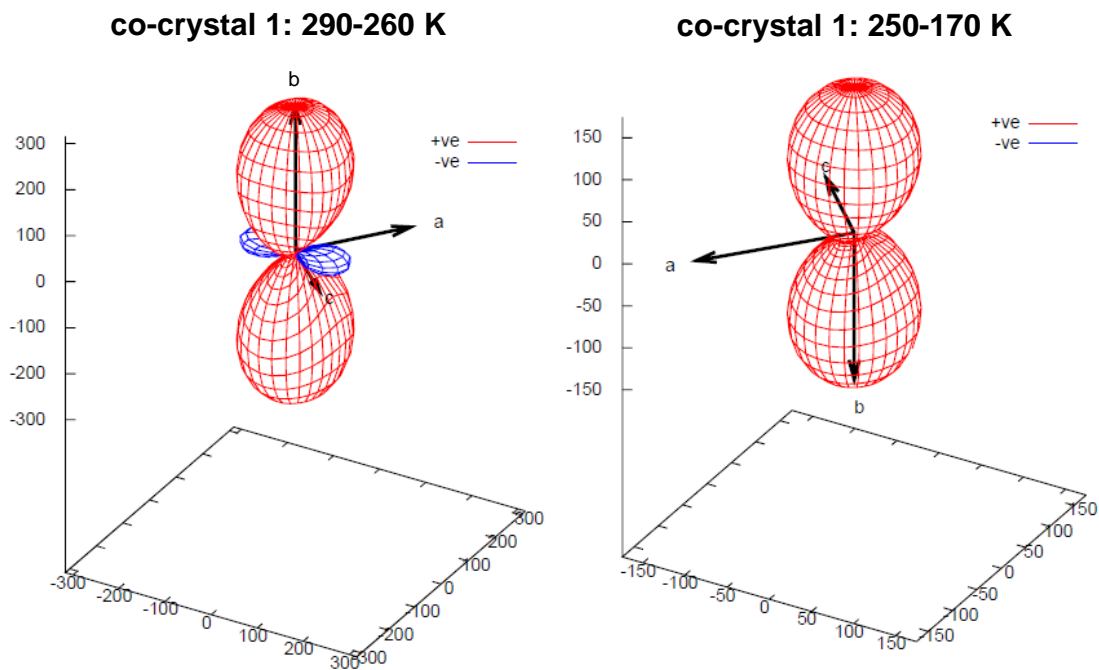

**Fig. S9.** Expansivity indicatrix representing the 3D plot of the calculated thermal expansion coefficients along the crystallographic axes for co-crystal **1**. Red represents PTE and blue represents NTE.

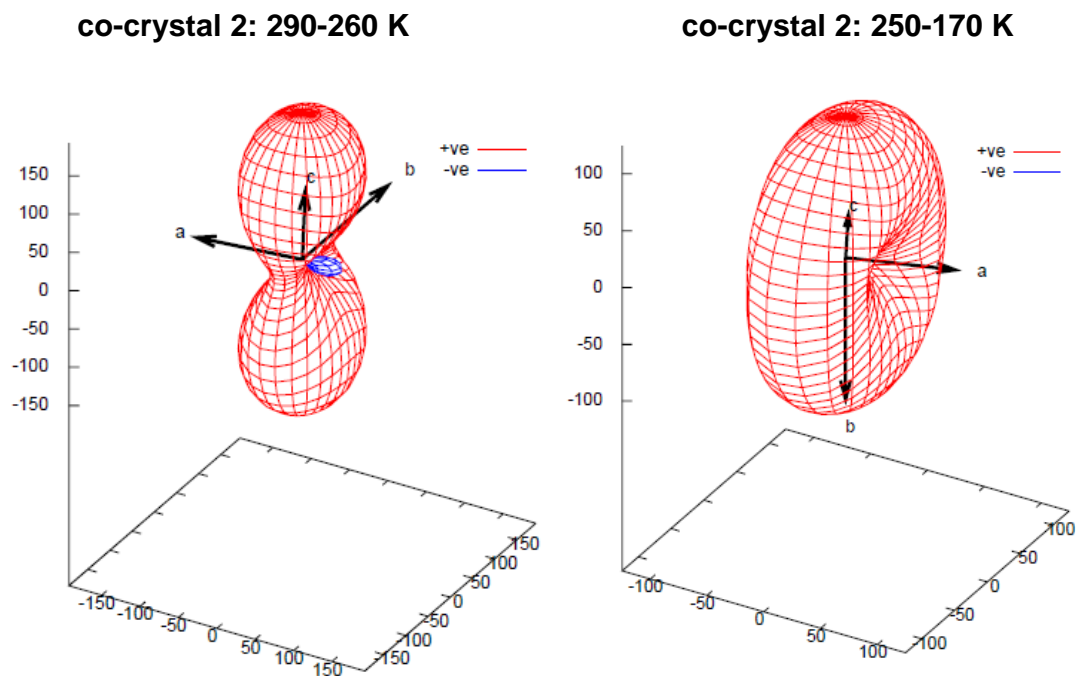

**Fig. S10.** Expansivity indicatrix representing the 3D plot of the calculated thermal expansion coefficients along the crystallographic axes for co-crystal **2**. Red represents PTE and blue represents NTE.



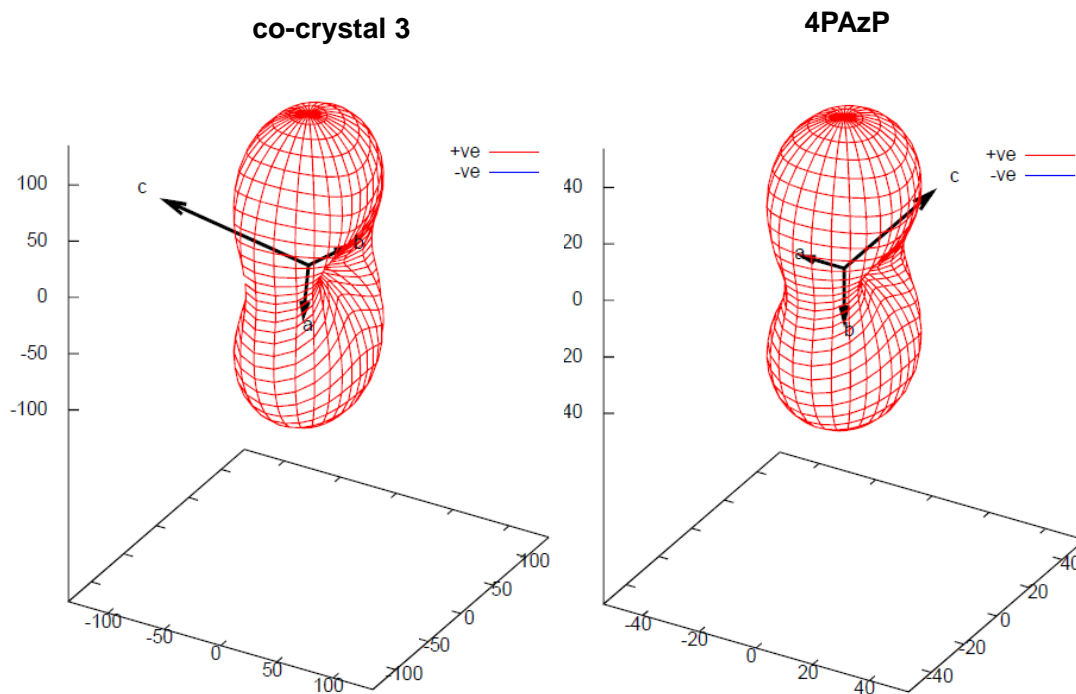

**Fig. S11.** Expansivity indicatrix representing the 3D plot of the calculated thermal expansion coefficients along the crystallographic axes for co-crystal **3** and **4PAzP**. Red represents PTE and blue represents NTE.

## References

1. A. Bannwarth, *et al.*, *Eur. J. Inorg. Chem.*, 2012, **2012**, 2776.
2. G. M. A. Sheldrick, *Acta Crystallogr. Sect. A: Found. Crystallogr.*, 2008, **64**, 112.
3. O. V. Dolomanov, L. J. Bourhis, R. J. Gildea, J. A. K. Howard, H. Puschmann, *J. Appl. Cryst.*, 2009, **42**, 339.
4. R. Shang, G. C. Xu, Z. M. Wang, S. Gao, *Chem. Eur. J.* 2014, **20**, 1146.
5. V. Korthuis, N. Khosrovani, A. W. Sleight, *Chem. Mater.* 1995, **7**, 412.
6. S. R. Saha, *et al.*, *Phys. Rev. B* 2012, **85**, 024525/1.
7. M. J. Cliffe, A. L. Goodwin, *J. Appl. Crystallogr.* 2012, **45**, 1321.
